# Supplementary material for: Standardising the “Gregory method” for calculating equilibrium climate sensitivity
Source: Copernicus journal article supplement (doi:10.5194/gmd-18-9433-2025), 2025-12-03
Supplement: Supplementary file 1 [file egusphere-2025-2252-supp-table.xlsx]

## Sheet: Table S1 - grid configs
Table S1. Showing model variant, institution, grid configuration and resolution (obtained from model attributes).
model		variant	institution		grid											grid label	resolution
ACCESS-CM2		r1i1p1f1	CSIRO-ARCCSS		Native N96 grid; 192 x 144 longitude/latitude											gn	250 km
ACCESS-ESM1-5		r1i1p1f1	CSIRO		native atmosphere N96 grid (145x192 latxlon)											gn	250 km
AWI-CM-1-1-MR		r1i1p1f1	AWI		T127L95 native atmosphere T127 gaussian grid; 384 x 192 longitude/latitude											gn	100 km
BCC-CSM2-MR		r1i1p1f1	BCC		T106											gn	100 km
BCC-ESM1		r1i1p1f1	BCC		T42											gn	250 km
CESM2		r1i1p1f1	NCAR		native 0.9x1.25 finite volume grid (192x288 latxlon)											gn	100 km
CESM2-FV2		r1i1p1f1	NCAR		native 1.9x2.5 finite volume grid (96x144 latxlon)											gn	100 km
CESM2-WACCM		r1i1p1f1	NCAR		native 0.9x1.25 finite volume grid (192x288 latxlon)											gn	100 km
CESM2-WACCM-FV2		r1i1p1f1	NCAR		native 1.9x2.5 finite volume grid (96x144 latxlon)											gn	100 km
CMCC-CM2-SR5		r1i1p1f1	CMCC		native atmosphere regular grid											gn	100 km
CMCC-ESM2		r1i1p1f1	CMCC		native atmosphere regular grid											gn	100 km
CNRM-CM6-1		r1i1p1f2	CNRM-CERFACS		data regridded to a T127 gaussian grid (128x256 latlon) from a native atmosphere T127l reduced gaussian grid											gr	250 km
CNRM-ESM2-1		r1i1p1f2	CNRM-CERFACS		data regridded to a T127 gaussian grid (128x256 latlon) from a native atmosphere T127l reduced gaussian grid											gr	250 km
CanESM5		r1i1p1f1	CCCma		T63L49 native atmosphere, T63 Linear Gaussian Grid; 128 x 64 longitude/latitude; 49 levels; top level 1 hPa											gn	500 km
CanESM5-1		r1i1p1f1	CCCma		T63L49 native atmosphere, T63 Linear Gaussian Grid; 128 x 64 longitude/latitude; 49 levels; top level 1 hPa											gn	500 km
E3SM-1-0		r1i1p1f1	E3SM-Project		data regridded to a CMIP6 standard 1x1 degree lonxlat grid from the native grid using an area-average preserving method.											gr	100 km
E3SM-2-0		r1i1p1f1	E3SM-Project		data regridded to a CMIP6 standard 1x1 degree lonxlat grid from the native grid using an area-average preserving method.											gr	100 km
E3SM-2-0-NARRM		r1i1p1f1	E3SM-Project		data regridded to a CMIP6 standard 1x1 degree lonxlat grid from the native grid using an area-average preserving method.											gr	100 km
EC-Earth3-AerChem		r1i1p1f1	EC-Earth-Consortium		T255L91											gr	100 km
EC-Earth3-CC		r1i1p1f1	EC-Earth-Consortium		T255L91											gr	100 km
EC-Earth3-Veg-LR		r1i1p1f1	EC-Earth-Consortium		T159L62-ORCA1L75											gr	250 km
FGOALS-g3		r1i1p1f1	CAS		native atmosphere area-weighted latxlon grid (80x180 latxlon)											gn	250 km
GISS-E2-1-G		r1i1p1f1	NASA-GISS		atmospheric grid: 144x90, ocean grid: 288x180											gn	250 km
GISS-E2-1-H		r1i1p1f1	NASA-GISS		atmospheric grid: 144x90, ocean grid: 360x180											gn	250 km
GISS-E2-2-G		r1i1p1f1	NASA-GISS		atmospheric grid: 144x90, ocean grid: 288x180											gn	250 km
HadGEM3-GC31-LL		r1i1p1f3	MOHC		Native N96 grid; 192 x 144 longitude/latitude											gn	250 km
HadGEM3-GC31-MM		r1i1p1f3	MOHC		Native N216 grid; 432 x 324 longitude/latitude											gn	100 km
INM-CM4-8		r1i1p1f1	INM		gs2x1.5											gr1	100 km
INM-CM5-0		r1i1p1f1	INM		gs2x1.5											gr1	100 km
IPSL-CM5A2-INCA		r1i1p1f1	IPSL		LMDZ grid											gr	500 km
IPSL-CM6A-LR		r1i1p1f1	IPSL		LMDZ grid											gr	250 km
IPSL-CM6A-MR1		r1i1p1f1	IPSL		LMDZ grid											gr	100 km
MIROC-ES2L		r1i1p1f2	MIROC		native atmosphere T42 Gaussian grid											gn	500 km
MIROC6		r1i1p1f1	MIROC		native atmosphere T85 Gaussian grid											gn	250 km
MPI-ESM-1-2-HAM		r1i1p1f1	HAMMOZ-Consortium		spectral T63; 192 x 96 longitude/latitude											gn	250 km
MPI-ESM1-2-HR		r1i1p1f1	MPI-M		spectral T127; 384 x 192 longitude/latitude											gn	100 km
MPI-ESM1-2-LR		r1i1p1f1	MPI-M		spectral T63; 192 x 96 longitude/latitude											gn	250 km
MRI-ESM2-0		r1i1p1f1	MRI		native atmosphere TL159 gaussian grid (160x320 latxlon)											gn	100 km
NorCPM1		r1i1p1f1	NCC		finite-volume grid with 1.9x2.5 degree lat/lon resolution											gn	250 km
NorESM2-LM		r1i1p1f1	NCC		finite-volume grid with 1.9x2.5 degree lat/lon resolution											gn	250 km
NorESM2-MM		r1i1p1f1	NCC		finite-volume grid with 0.9x1.25 degree lat/lon resolution											gn	100 km
SAM0-UNICON		r1i1p1f1	SNU		CESM f09_g16 resolution											gn	100 km
TaiESM1		r1i1p1f1	AS-RCEC		finite-volume grid with 0.9x1.25 degree lat/lon resolution											gn	100 km
UKESM1-0-LL		r1i1p1f2	MOHC		Native N96 grid; 192 x 144 longitude/latitude											gn	250 km

## Sheet: Table S2 - ECS paths
Table S2. ECS (K) for labelled pathways (Fig. 1), when using rtmt, cos(lat) approximation, and the Zelinka et al. (2020) ECS estimates. Note that the Zelinka et al. (2020) values were accessed from Zelinka (2022: 10.5281/zenodo.5206850)
model		Baseline (OLS)		Baseline (TLS)		Rolling	Linear	Longterm	rtmt	cos(lat)	Zelinka et al. (2020)
ACCESS-CM2		4.688		4.576		4.671	4.724	4.707	4.688	4.688	4.66
ACCESS-ESM1-5		3.898		3.673		3.889	3.879	3.865	3.898	3.897	3.88
AWI-CM-1-1-MR		3.404		3.306		3.398	3.387	3.414	NaN	3.11	3.16
BCC-CSM2-MR		3.045		2.828		3.025	3.046	2.968	3.11	3.044	3.02
BCC-ESM1		3.281		3.181		3.262	3.264	3.243	3.389	3.281	3.25
CESM2		5.17		4.824		5.176	5.174	5.175	5.279	5.171	5.15
CESM2-FV2		5.187		4.42		5.234	5.268	5.25	5.317	5.188	5.16
CESM2-WACCM		4.734		4.413		4.731	4.756	4.723	4.735	4.735	4.68
CESM2-WACCM-FV2		4.894		4.109		4.92	4.87	4.819	4.896	4.895	4.8
CMCC-CM2-SR5		3.542		3.432		3.56	3.525	3.555	NaN	3.542	3.55
CMCC-ESM2		3.567		3.409		3.582	3.58	3.557	NaN	3.567	3.58
CNRM-CM6-1		4.895		4.775		4.912	4.84	4.912	NaN	4.895	4.9
CNRM-ESM2-1		4.777		4.543		4.802	4.777	4.75	NaN	4.777	4.79
CanESM5		5.664		5.553		5.652	5.632	5.634	5.664	5.665	5.64
CanESM5-1		5.667		5.586		5.657	5.635	5.621	5.667	5.668	-
E3SM-1-0		5.292		5.148		5.308	5.311	5.327	5.292	5.292	5.31
E3SM-2-0		3.993		3.819		4.003	3.979	3.997	3.993	3.994	-
E3SM-2-0-NARRM		3.953		3.781		3.964	3.956	3.958	3.953	3.953	-
EC-Earth3-AerChem		4.242		4.121		4.235	4.202	4.169	4.242	4.242	4.23
EC-Earth3-CC		3.89		3.822		3.873	3.865	3.879	3.89	3.89	3.87
EC-Earth3-Veg-LR		4.248		4.173		4.244	4.245	4.275	4.248	4.248	4.23
FGOALS-g3		2.858		2.771		2.869	2.878	2.876	2.911	2.786	2.87
GISS-E2-1-G		2.691		2.584		2.715	2.722	2.71	2.691	2.691	2.71
GISS-E2-1-H		3.124		3.03		3.119	3.115	3.089	3.124	3.124	3.12
GISS-E2-2-G		2.432		2.304		2.429	2.415	2.395	2.432	2.432	2.43
HadGEM3-GC31-LL		5.54		5.47		5.546	5.546	5.416	5.54	5.54	5.55
HadGEM3-GC31-MM		5.287		5.214		5.27	5.254	5.257	5.287	5.444	5.44
INM-CM4-8		1.84		1.809		1.833	1.832	1.832	1.957	1.84	1.83
INM-CM5-0		1.921		1.865		1.922	1.919	1.917	1.919	1.921	1.92
IPSL-CM5A2-INCA		3.862		3.707		3.811	3.798	3.778	3.862	3.862	3.82
IPSL-CM6A-LR		4.616		4.418		4.619	4.623	4.6	4.616	4.616	4.7
IPSL-CM6A-MR1		4.659		4.557		4.644	4.618	4.575	4.659	4.659	-
MIROC-ES2L		2.66		2.532		2.661	2.676	2.663	2.66	2.661	2.66
MIROC6		2.584		2.398		2.604	2.61	2.563	2.584	2.584	2.6
MPI-ESM-1-2-HAM		3.356		3.222		3.326	3.326	3.266	NaN	2.997	2.95
MPI-ESM1-2-HR		3.206		3.036		3.169	3.152	3.125	NaN	2.994	2.98
MPI-ESM1-2-LR		3.085		2.994		3.087	3.073	3.07	NaN	3.028	3.03
MRI-ESM2-0		3.142		2.878		3.141	3.159	3.152	NaN	3.142	3.13
NorCPM1		2.847		2.68		2.856	2.829	2.826	2.847	2.847	3.03
NorESM2-LM		2.578		2.08		2.564	2.541	2.583	2.578	2.578	2.56
NorESM2-MM		2.524		2.135		2.484	2.502	2.437	2.525	2.525	2.49
SAM0-UNICON		3.669		3.384		3.668	3.647	3.706	3.7	3.669	3.72
TaiESM1		4.281		4.131		4.309	4.319	4.366	4.281	4.282	4.36
UKESM1-0-LL		5.362		5.285		5.359	5.337	5.368	5.362	5.362	5.36

## Sheet: Table S3 - N-variable data
Table S3. Showing model top, net radiative flux average over 150 years of the piControl for rndt, rtmt, and the difference between them, and the ECS percentage difference between estimates using rtmt and rndt
model		Model top	rndt	rtmt	rndt - rtmt	ECS rtmt percent difference (rndt)
ACCESS-CM2		85 km	0.39	0.39	0	0
ACCESS-ESM1-5		39255 m	-0.24	-0.24	0	0
AWI-CM-1-1-MR		80 km	NaN	NaN	NaN	NaN
BCC-CSM2-MR		1.46 hPa	-0.54	0.36	-0.9	-2.13746
BCC-ESM1		2.19 hPa	-0.39	0.7	-1.09	-3.2967
CESM2		2.25 mb	0.7	0.09	0.61	-2.11363
CESM2-FV2		4.5e-6 mb	0.58	-0.03	0.61	-2.51743
CESM2-WACCM		4.5e-6 mb	0.04	0.06	-0.02	-0.021155
CESM2-WACCM-FV2		4.5e-6 mb	-0.01	0.01	-0.02	-0.040992
CMCC-CM2-SR5		NaN	NaN	NaN	NaN	NaN
CMCC-ESM2		NaN	NaN	NaN	NaN	NaN
CNRM-CM6-1		78.4 km	NaN	NaN	NaN	NaN
CNRM-ESM2-1		78.4 km	NaN	NaN	NaN	NaN
CanESM5		1 hPa	0.09	0.09	0	0
CanESM5-1		1 hPa	0.08	0.08	0	0
E3SM-1-0		0.1 hPa	0	0	0	0
E3SM-2-0		60 km	-0.05	-0.05	0	0
E3SM-2-0-NARRM		NaN	-0.07	-0.07	0	0
EC-Earth3-AerChem		0.01 hPa	-0.1	-0.1	0	0
EC-Earth3-CC		0.01 hPa	-0.05	-0.05	0	0
EC-Earth3-Veg-LR		5 hPa	0.57	0.57	0	0
FGOALS-g3		2.19hPa	1.81	-0.12	1.93	-1.85704
GISS-E2-1-G		0.1 hPa	0.07	0.07	0	0
GISS-E2-1-H		0.1 hPa	0.03	0.03	0	0
GISS-E2-2-G		0.002 hPa	-0.38	-0.38	0	0
HadGEM3-GC31-LL		85 km	0.21	0.21	0	0
HadGEM3-GC31-MM		85 km	-0.37	-0.37	0	0
INM-CM4-8		sigma = 0.01	4.19	1.11	3.08	-6.36215
INM-CM5-0		sigma = 0.0002	1.61	1.59	0.02	0.104167
IPSL-CM5A2-INCA		80000 m	-0.03	-0.03	0	0
IPSL-CM6A-LR		40000 m	0.7	0.7	0	0
IPSL-CM6A-MR1		80000 m	0.55	0.55	0	0
MIROC-ES2L		3 hPa	0.89	0.89	0	0
MIROC6		0.004 hPa	1.1	1.1	0	0
MPI-ESM-1-2-HAM		0.01 hPa	NaN	NaN	NaN	NaN
MPI-ESM1-2-HR		0.01 hPa	NaN	NaN	NaN	NaN
MPI-ESM1-2-LR		0.01 hPa	NaN	NaN	NaN	NaN
MRI-ESM2-0		0.01 hPa	NaN	NaN	NaN	NaN
NorCPM1		~2 hPa	0.13	0.13	0	0
NorESM2-LM		3 mb	-0.04	-0.04	0	0
NorESM2-MM		3 mb	-0.07	-0.07	0	-0.039604
SAM0-UNICON		~2 hPa	1.73	-0.19	1.92	-0.846301
TaiESM1		~2 hPa	0.04	0.04	0	0
UKESM1-0-LL		85 km	0	0	0	0

## Sheet: Table S4 - ECS uncertainty
Table S4. ECS uncertainty using a standard bootstrap approach and block bootstrap approach (using block size of 4 years)
model		ECS (baseline)		median (standard)		95th (standard)		median (block)		95th (block)
ACCESS-CM2		4.68788		4.80387		4.6 - 5.02		4.86275		4.7 - 5.34
ACCESS-ESM1-5		3.89759		3.99577		3.8 - 4.32		4.07916		3.8 - 4.71
AWI-CM-1-1-MR		3.40446		3.4269		3.4 - 3.51		3.43099		3.4 - 3.51
BCC-CSM2-MR		3.04459		3.09751		3.0 - 3.30		3.13735		3.0 - 3.51
BCC-ESM1		3.28138		3.31952		3.2 - 3.46		3.35415		3.2 - 3.64
CESM2		5.16999		5.32271		4.9 - 5.87		5.52528		5.1 - 6.18
CESM2-FV2		5.18666		5.65615		5.1 - 6.77		5.78787		5.2 - 6.90
CESM2-WACCM		4.73418		4.87993		4.6 - 5.38		5.02888		4.6 - 5.73
CESM2-WACCM-FV2		4.894		4.90348		4.5 - 5.67		4.86914		4.4 - 6.20
CMCC-CM2-SR5		3.54162		3.55002		3.5 - 3.64		3.55146		3.5 - 3.63
CMCC-ESM2		3.56715		3.56959		3.5 - 3.71		3.56213		3.5 - 3.64
CNRM-CM6-1		4.89512		4.93552		4.8 - 5.09		4.94419		4.8 - 5.12
CNRM-ESM2-1		4.77692		4.72419		4.5 - 5.00		4.66028		4.4 - 4.93
CanESM5		5.66403		5.68159		5.5 - 5.90		5.68885		5.6 - 5.85
CanESM5-1		5.66742		5.70492		5.6 - 5.85		5.73154		5.6 - 5.92
E3SM-1-0		5.2918		5.34081		5.2 - 5.54		5.37571		5.2 - 5.69
E3SM-2-0		3.99335		4.04571		3.9 - 4.20		4.0799		4.0 - 4.26
E3SM-2-0-NARRM		3.95268		3.97985		3.8 - 4.15		3.9955		3.9 - 4.19
EC-Earth3-CC		4.24193		4.28029		4.2 - 4.44		4.31799		4.2 - 4.47
EC-Earth3-AerChem		3.89026		3.91106		3.8 - 3.99		3.92301		3.9 - 3.99
EC-Earth3-Veg-LR		4.24842		4.29276		4.2 - 4.43		4.30871		4.2 - 4.47
FGOALS-g3		2.85796		2.87081		2.8 - 2.97		2.91026		2.8 - 3.09
GISS-E2-1-G		2.69075		2.6778		2.6 - 2.74		2.68274		2.6 - 2.78
GISS-E2-1-H		3.1238		3.13991		3.1 - 3.22		3.12199		3.0 - 3.19
GISS-E2-2-G		2.43203		2.44307		2.4 - 2.51		2.43596		2.3 - 2.50
HadGEM3-GC31-LL		5.5402		5.59364		5.5 - 5.75		5.62788		5.5 - 5.80
HadGEM3-GC31-MM		5.28702		5.33146		5.2 - 5.47		5.33192		5.2 - 5.45
INM-CM4-8		1.83979		1.84893		1.8 - 1.88		1.85634		1.8 - 1.89
INM-CM5-0		1.92094		1.9451		1.9 - 2.00		1.9615		1.9 - 2.06
IPSL-CM5A2-INCA		3.86241		3.90329		3.8 - 4.06		3.90323		3.8 - 4.12
IPSL-CM6A-LR		4.61616		4.73486		4.6 - 4.93		4.77922		4.7 - 4.99
IPSL-CM6A-MR1		4.65914		4.70444		4.6 - 4.83		4.68241		4.6 - 4.78
MIROC-ES2L		2.66016		2.65666		2.6 - 2.75		2.65574		2.6 - 2.70
MIROC6		2.58376		2.58237		2.5 - 2.67		2.56973		2.5 - 2.64
MPI-ESM-1-2-HAM		3.35613		3.40964		3.3 - 3.55		3.45484		3.3 - 3.81
MPI-ESM1-2-HR		3.20557		3.22402		3.1 - 3.38		3.24151		3.1 - 3.63
MPI-ESM1-2-LR		3.08529		3.10523		3.0 - 3.17		3.10325		3.0 - 3.20
MRI-ESM2-0		3.14168		3.22564		3.1 - 3.45		3.25674		3.1 - 3.52
NorCPM1		2.84676		2.89858		2.8 - 3.09		2.91389		2.8 - 3.15
NorESM2-LM		2.57789		2.69683		2.5 - 3.04		2.73738		2.6 - 3.08
NorESM2-MM		2.52445		2.62261		2.4 - 2.98		2.69194		2.5 - 2.96
SAM0-UNICON		3.66884		3.74272		3.6 - 4.02		3.80397		3.6 - 4.24
TaiESM1		4.28121		4.37169		4.2 - 4.56		4.41678		4.3 - 4.61
UKESM1-0-LL		5.36202		5.41245		5.3 - 5.54		5.4182		5.3 - 5.57
