# Supplementary material for: Standardising the “Gregory method” for calculating equilibrium climate sensitivity
Source: Copernicus journal article supplement (doi:10.5194/gmd-18-9433-2025), 2025-12-03
Supplement: Supplementary file [file gmd-18-9433-2025-supplement-title-page.pdf › gmd-18-9433-2025-supplement-title-page.pdf]

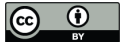

*Supplement of*

## **Standardising the “Gregory method” for calculating equilibrium climate sensitivity**

**Anna Zehrung et al.**

*Correspondence to:* Anna Zehrung (azehrung@student.unimelb.edu.au)

- gmd-18-9433-2025-supplement-title-page.pdf
- Supplementary-revisions-final.pdf
- egusphere-2025-2252-supp-table.xlsx

The copyright of individual parts of the supplement might differ from the article licence.
